# Supplementary material for: Ketogenic Diet High in Saturated Fat Promotes Colonic Claudin Expression without Changes in Intestinal Permeability to Iohexol in Healthy Mice
Source: MDPI journal article supplement (doi:10.3390/nu16010018), 2023-12-20
Supplement: s1 [file s1]

**A** **Claudin-1**

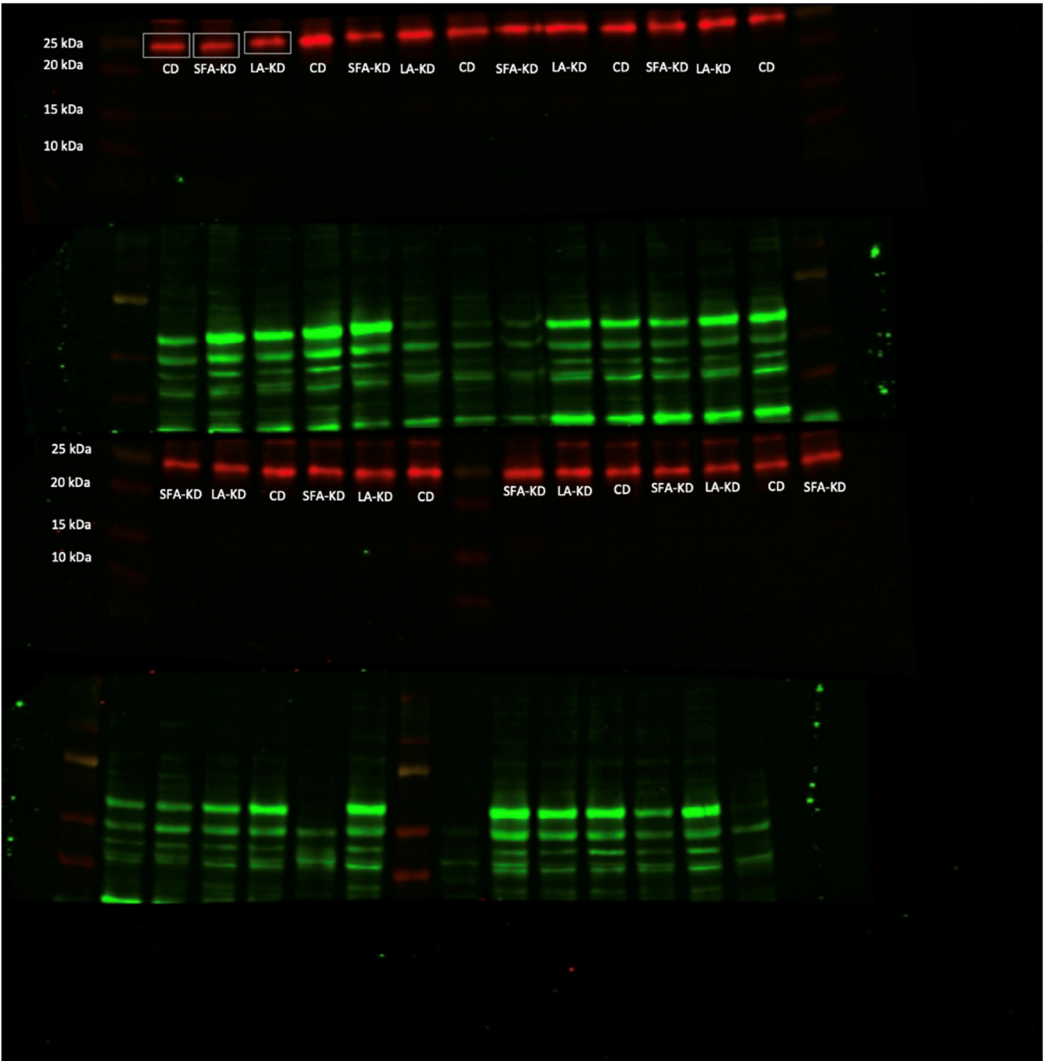

**β-actin for claudin-1**

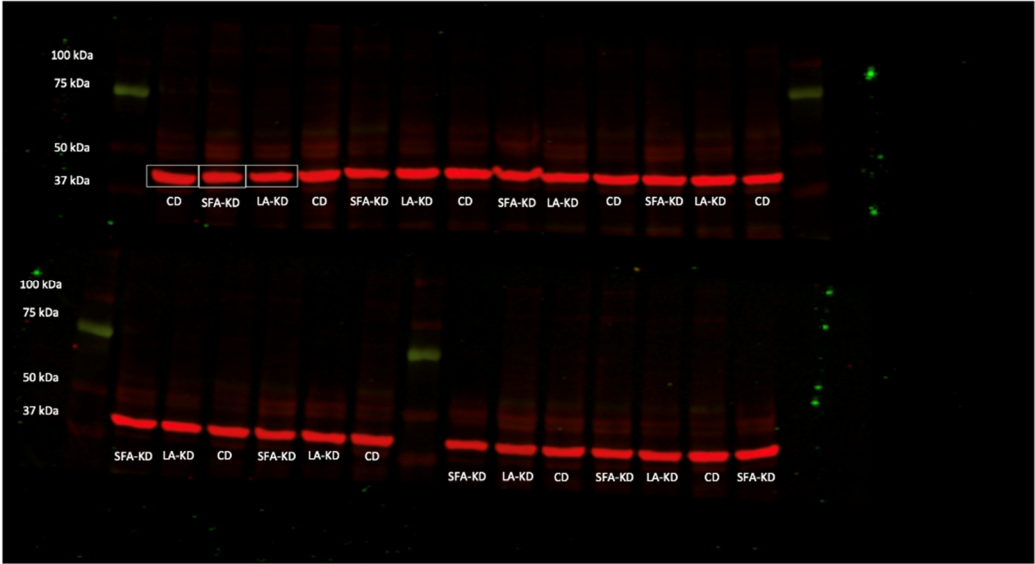

**B****Claudin-2**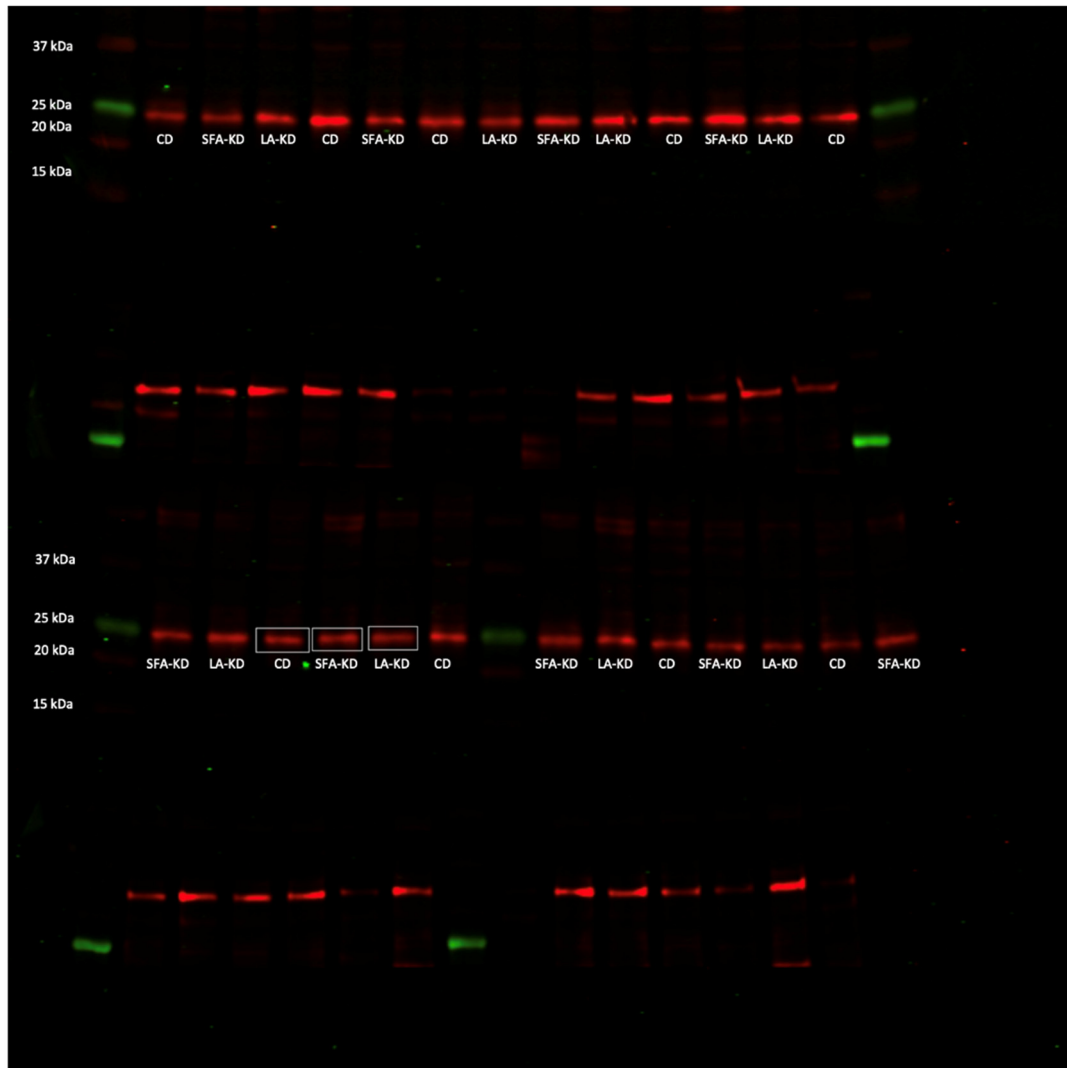 **$\beta$ -actin for claudin-2**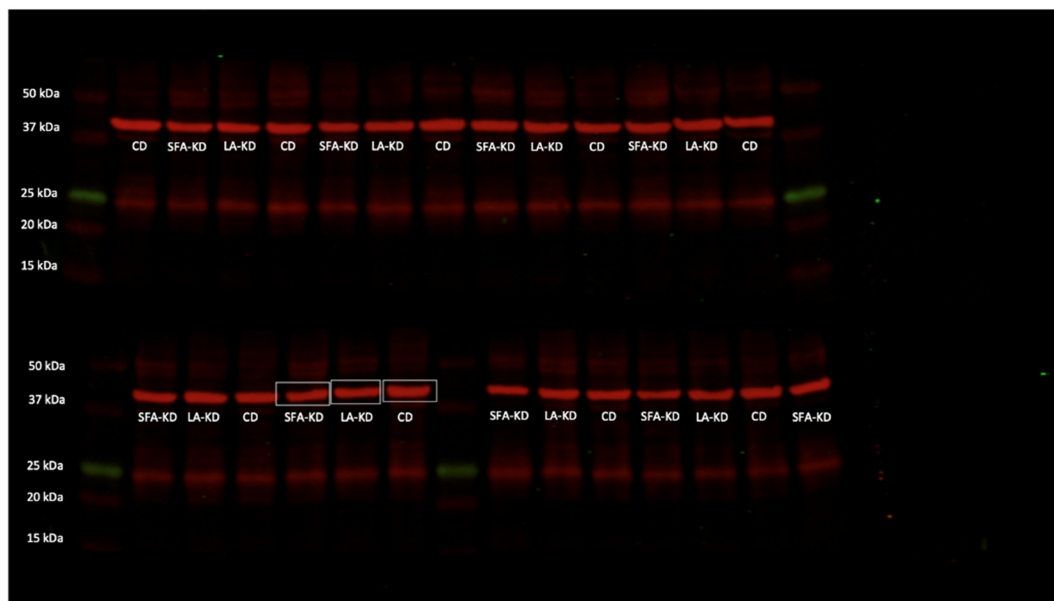

**C****Claudin-4 and  $\beta$ -actin**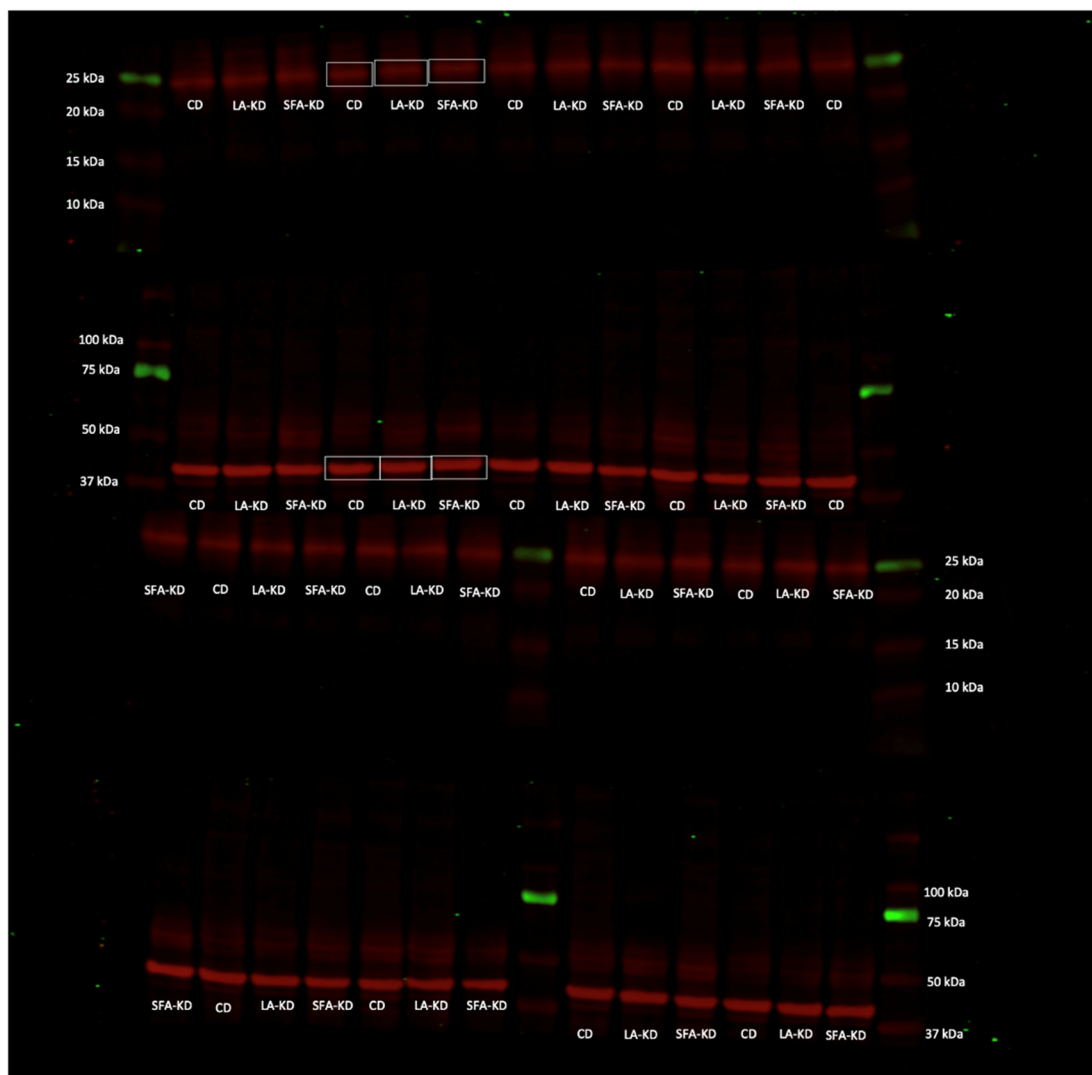

**D****Occludin**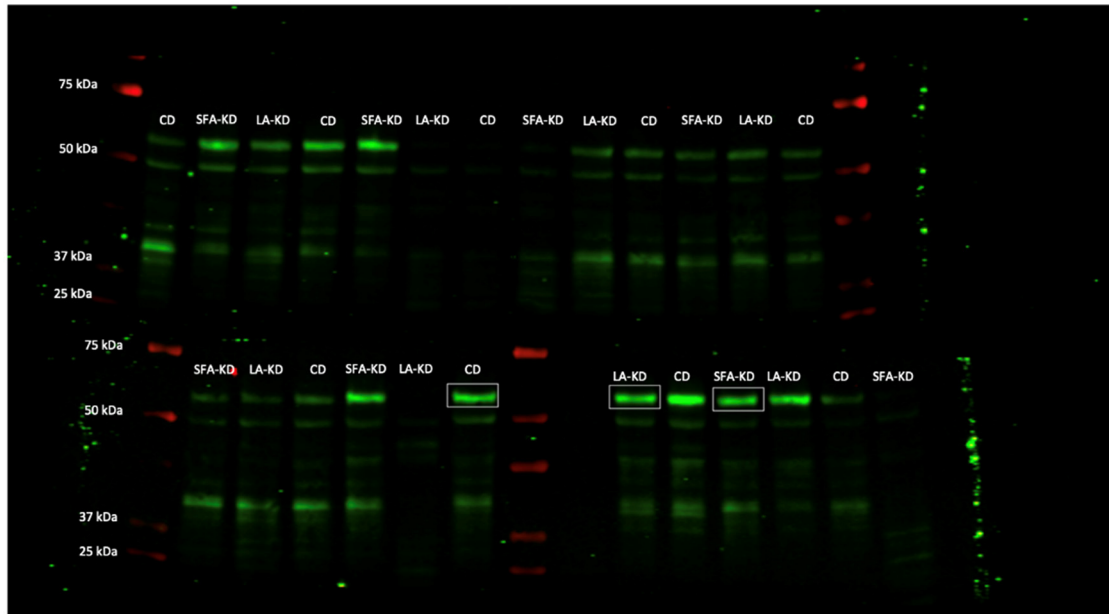 **$\beta$ -actin for occludin**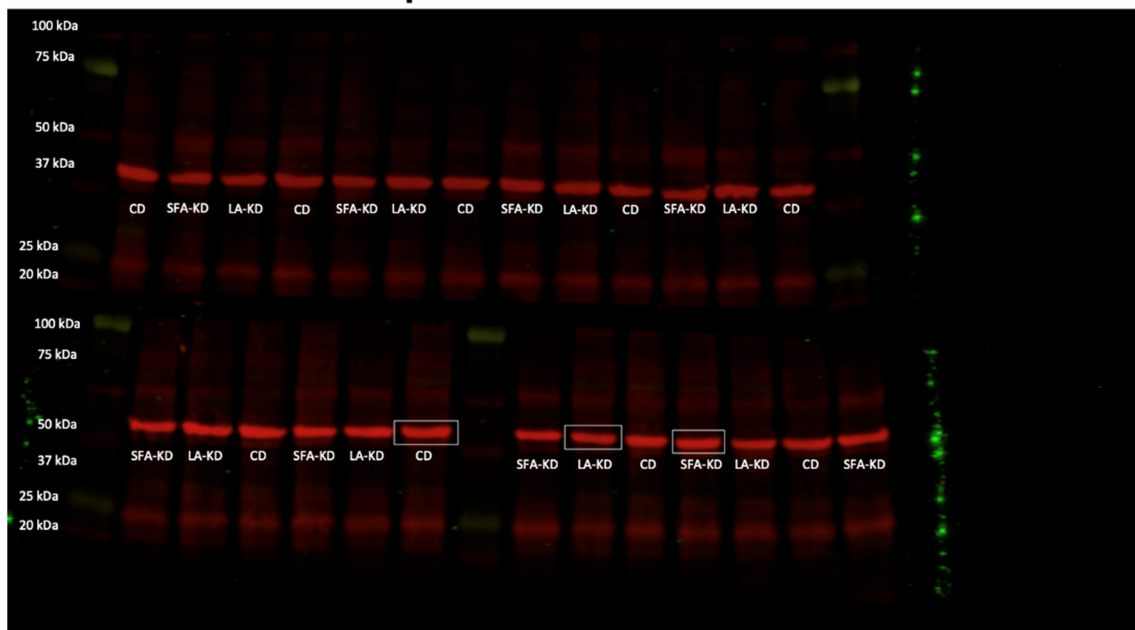

**Figure S1.** Original and unmodified Western Blot images of jejunal tight junction proteins. A. Claudin-1, B. claudin-2, C. claudin-4, and D. occludin and their loading control ( $\beta$ -actin). The bands presented in the manuscript are circled. CD = control diet, LA-KD = ketogenic diet with linoleic acid, SFA-KD = ketogenic diet with saturated fatty acids.

A

Claudin-1 and occludin

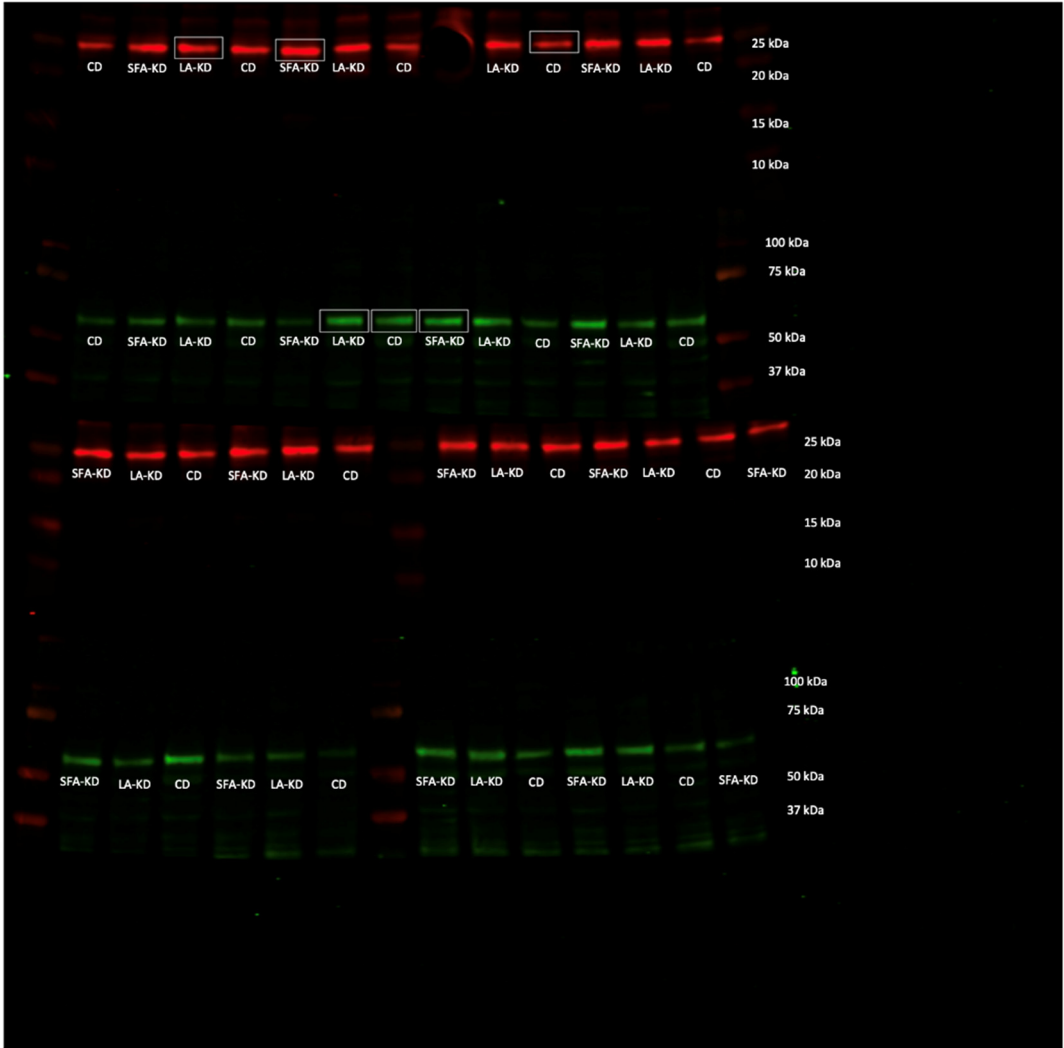

$\beta$ -actin for claudin-1 and occludin

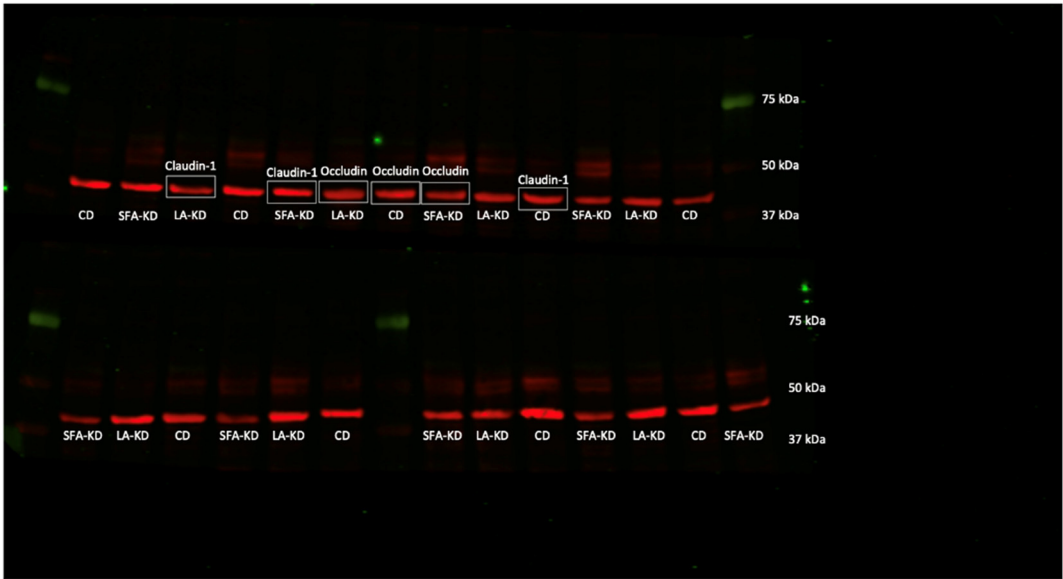

**B**

**Claudin-2**

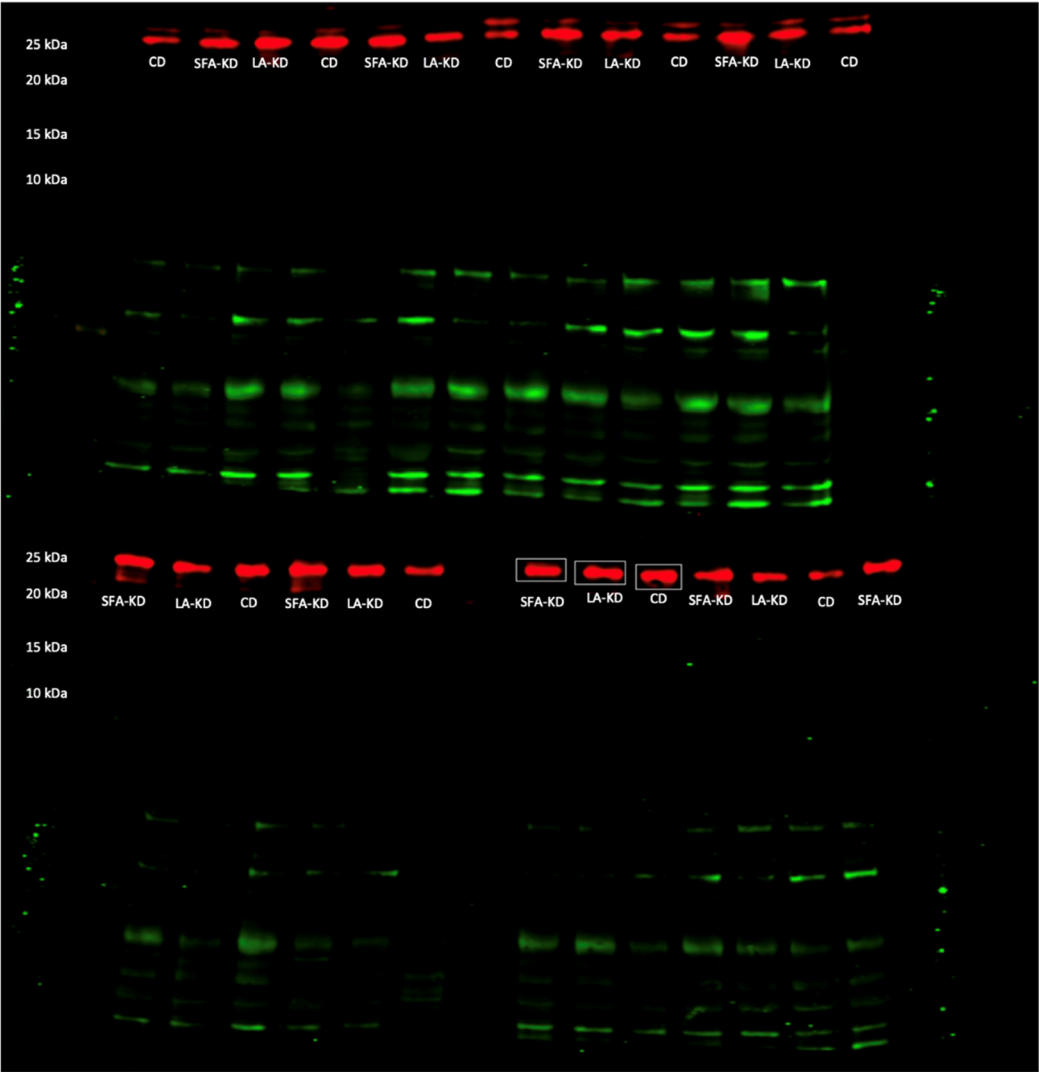

**$\beta$ -actin for claudin-2**

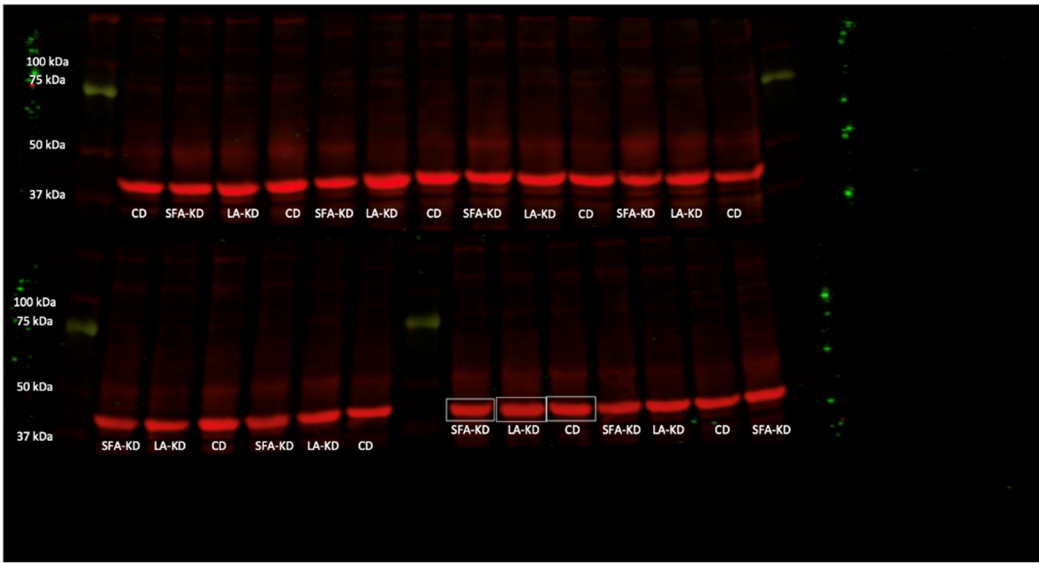



**C****Claudin-4**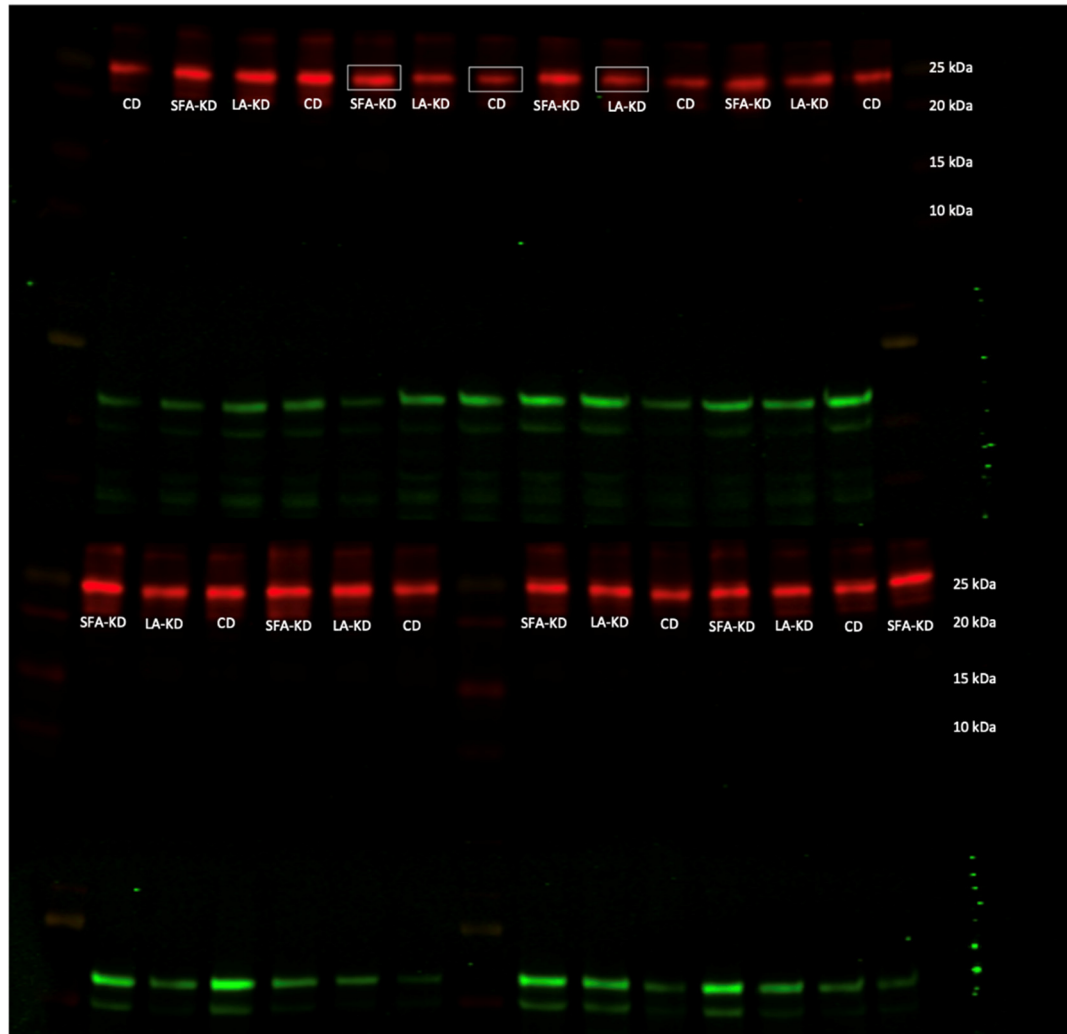 **$\beta$ -actin for claudin-4**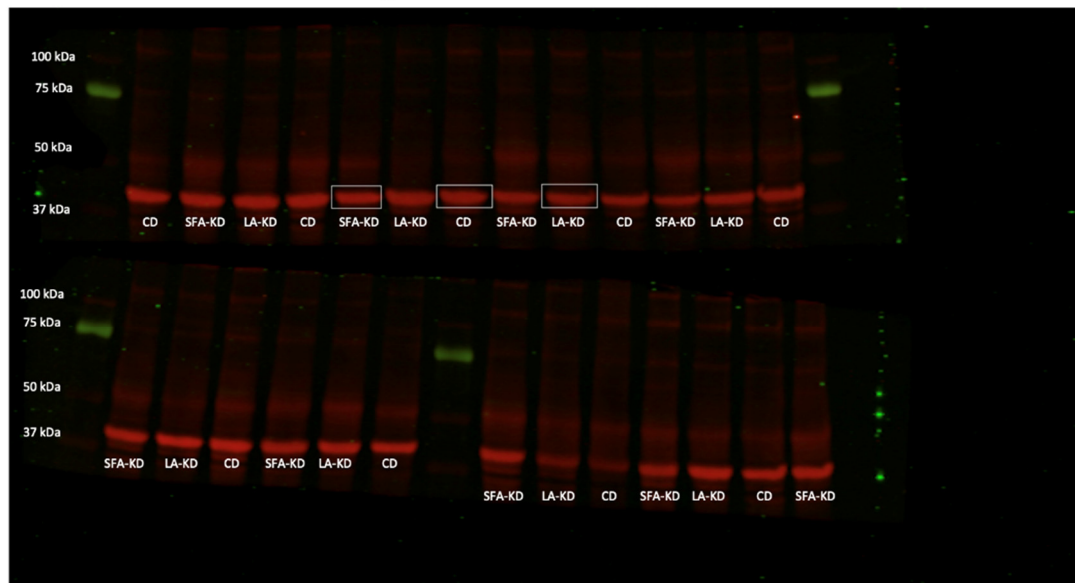

**Figure S2.** Original and unmodified Western Blot images of colonic tight junction proteins. A. Claudin-1 and occludin, B. claudin-2, and C. claudin-4, and their loading control ( $\beta$ -actin). The bands presented in the manuscript are circled. CD = control diet, LA-KD = ketogenic diet with linoleic acid, SFA-KD = ketogenic diet with saturated fatty acids.
